# Supplementary material for: Comprehensive analysis of cellular senescence and immune microenvironment in papillary thyroid carcinoma
Source: Aging (Albany NY). 2024 Feb 7;16(3):2866–86. doi: 10.18632/aging.205520 (PMC10911381; doi:10.18632/aging.205520)
Supplement: Supplementary Table 1 [file aging-16-205520-s002.xlsx]

## Sheet: Supplementary Table 1
Supplementary Table 1. A list of cellular senescence-related genes.
Gene_Symbol
AAK1
ABI3
ACLY
ADCK5
AGT
AKR1B1
AKT1
ALOX15B
AR
ARPC1B
ASF1A
ASPH
ATF7IP
ATM
AURKA
AXL
BAG3
BCL6
BHLHE40
BLK
BLVRA
BMI1
BRAF
BRCA1
BRD7
BTG3
CAV1
CAVIN1
CBX7
CBX8
CCN1
CCND1
CDK1
CDK18
CDK2AP1
CDK4
CDK6
CDKN1A
CDKN1B
CDKN1C
CDKN2A
CDKN2AIP
CDKN2B
CEBPB
CENPA
CHEK1
CIP2A
CKB
CPEB1
CSNK1A1
CSNK2A1
CTNNAL1
CXCL1
CXCL8
DDB2
DEK
DGCR8
DHCR24
DHX9
DLX2
DPY30
DUSP16
DUSP3
E2F1
EHF
ENDOG
EPHA3
ERRFI1
ETS1
ETS2
EWSR1
EZH2
FASTK
FBXO31
FOS
FOXM1
FOXO3
FXR1
G6PD
GATA4
GKN1
GLB1
GNG11
GRK6
HDAC1
HDAC4
HEPACAM
HIVEP1
HJURP
HK3
HMGB1
HRAS
HSPA5
HSPB2
ID1
ID4
IFNG
IGFBP1
IGFBP3
IGFBP5
IGFBP6
IL1A
ING1
ING2
IRF3
IRF5
IRF7
ITGB4
ITPK1
ITPKB
ITSN2
KCNJ12
KDM4A
KDM5B
KL
KSR2
LATS1
LEO1
LGALS3
LIMA1
LIMK1
MAD2L1
MAGEA2
MAGOH
MAGOHB
MAP2K1
MAP2K2
MAP2K3
MAP2K6
MAP2K7
MAP3K6
MAP3K7
MAP4K1
MAPK12
MAPK14
MAPKAPK5
MARCHF5
MAST1
MATK
MCL1
MCRS1
MDH1
MECP2
MMP9
MOB3A
MORC3
MORF4
MVK
MXD4
MYC
MYLK
NADK
NANOG
NDRG1
NEK1
NEK4
NEK6
NFE2L2
NINJ1
NOTCH3
NOX4
NR2E1
NTN4
NUAK1
OTX2
P3H1
PAK4
PATZ1
PBRM1
PCGF2
PDCD10
PDIK1L
PDPK1
PDZD2
PEBP1
PEX19
PIAS4
PIK3C2A
PIK3R5
PIM1
PKM
PLA2R1
PML
PMVK
PNPT1
POT1
POU5F1
PPM1B
PPM1D
PRKCD
PRKCH
PRMT6
PROX1
PRPF19
PSMB5
PSMD14
PTTG1
RAD21
RAF1
RB1
RBP2
RBX1
RNASEL
RPS6KA6
RSL1D1
RUNX1
RUVBL2
SELENOH
SENP1
SENP2
SENP7
SERPINE1
SFN
SGK1
SIK1
SIN3B
SIRT1
SIRT6
SIX1
SLC13A3
SLC16A7
SMARCA4
SMARCB1
SMG1
SMURF2
SNAI1
SOCS1
SOD1
SORBS2
SOX2
SOX5
SP1
SPIN1
SPOP
SRC
SREBF1
SRSF1
STAT5B
STK32C
STK40
SUPT5H
SYK
TACC3
TBX2
TERC
TERF2
TERT
TFAP4
TFDP1
TGFB1I1
TLR3
TMSB4X
TNFSF13
TNFSF15
TOP1
TP53
TP63
TPR
TRIM28
TRPM8
TXN
TXNIP
TYK2
UBTD1
USP1
VEGFA
VENTX
WNT16
WNT2
WRN
WT1
WWP1
XAF1
YAP1
YPEL3
ZFP36
ZMAT3
ZNF148
