# Supplementary material for: Comprehensive analysis of cellular senescence and immune microenvironment in papillary thyroid carcinoma
Source: Aging (Albany NY). 2024 Feb 7;16(3):2866–86. doi: 10.18632/aging.205520 (PMC10911381; doi:10.18632/aging.205520)
Supplement: Supplementary Table 2 [file aging-16-205520-s003.xlsx]

## Sheet: Supplementary Table 2
Supplementary Table 2. Genes associated with cellular senescence are differentially expressed between tumor tissue and normal tissue in the TCGA-THCA.
gene	conMean	treatMean	logFC	pValue	fdr
AAK1	6.9407	3.38982	-1.03387	1.31346e-23	1.39008e-22
ABI3	4.12842	5.69043	0.462948	8.12641e-09	2.00399e-08
ADCK5	2.36601	2.71734	0.199737	0.0109427	0.014327
AGT	1.60741	3.85885	1.26343	4.44095e-06	8.23358e-06
AKT1	11.6313	13.5812	0.223597	8.3352e-07	1.65402e-06
ALOX15B	2.03715	16.8555	3.0486	4.23122e-16	1.91916e-15
AR	1.98735	0.904607	-1.13549	9.77514e-19	5.64292e-18
ARPC1B	28.5495	34.9978	0.293802	1.49673e-06	2.85842e-06
ASPH	9.43782	5.30241	-0.831806	2.59979e-21	2.00105e-20
ATF7IP	8.61078	9.72146	0.175029	0.0030059	0.00410483
ATM	3.48531	2.35755	-0.564	1.14948e-13	4.23142e-13
AURKA	1.14899	0.87044	-0.40055	0.000701738	0.00100701
AXL	6.93453	9.21326	0.409913	4.95702e-05	8.12311e-05
BAG3	26.706	29.0155	0.11966	1.48731e-07	3.14813e-07
BCL6	9.90887	6.76371	-0.550905	7.54442e-10	2.0386e-09
BHLHE40	33.1826	90.1319	1.44161	1.39713e-17	7.39315e-17
BLK	1.40431	0.325135	-2.11075	2.87397e-10	8.02186e-10
BLVRA	16.8767	21.5061	0.34972	1.01474e-11	3.03227e-11
BMI1	8.18295	9.85259	0.267882	7.59231e-08	1.63428e-07
BRD7	7.90466	8.17591	0.0486763	0.0253857	0.0322398
BTG3	16.6709	20.5203	0.299713	1.24692e-05	2.2304e-05
CAV1	109.661	77.451	-0.501696	7.1802e-06	1.32157e-05
CAVIN1	85.4631	106.24	0.313957	1.73436e-05	2.95656e-05
CBX7	14.9071	12.4941	-0.254747	6.39607e-07	1.27921e-06
CBX8	1.60284	2.01867	0.332778	0.000463166	0.000680024
CCN1	417.633	118.815	-1.81352	3.78455e-16	1.81373e-15
CCND1	32.5516	109.393	1.74872	6.44914e-31	4.09521e-29
CDK1	1.36355	1.49156	0.129459	0.000117746	0.000184614
CDK18	4.02563	5.07724	0.334828	1.22462e-10	3.5347e-10
CDK2AP1	10.4301	14.0643	0.431279	4.23122e-16	1.91916e-15
CDK4	18.631	20.8951	0.165461	3.42323e-06	6.39338e-06
CDK6	1.66191	1.27952	-0.377232	5.10868e-08	1.15378e-07
CDKN1A	49.4275	96.2079	0.96084	7.54557e-13	2.48906e-12
CDKN1B	29.8774	24.6603	-0.27686	1.40112e-07	2.99063e-07
CDKN1C	5.14986	4.1664	-0.305732	1.2262e-06	2.3958e-06
CDKN2A	0.149938	1.19521	2.99483	4.27484e-23	4.34323e-22
CDKN2AIP	9.58998	7.57597	-0.340096	5.18472e-14	2.02129e-13
CDKN2B	0.387927	2.79211	2.8475	6.65863e-32	8.45646e-30
CHEK1	0.867818	1.10275	0.345647	1.02637e-09	2.68762e-09
CIP2A	0.85204	0.538565	-0.661801	5.25218e-14	2.02129e-13
CKB	102.484	63.2092	-0.697189	6.93027e-14	2.58866e-13
CPEB1	0.449011	0.604411	0.428777	0.034814	0.0433468
CSNK1A1	10.2757	9.40879	-0.127148	0.0248371	0.0317016
CSNK2A1	13.9199	13.1686	-0.0800529	0.00436934	0.00590326
CXCL8	1.10043	3.82044	1.79568	1.44084e-06	2.77252e-06
DDB2	2.65902	6.35978	1.25808	1.14676e-27	2.42731e-26
DEK	46.8712	33.0916	-0.502236	8.40293e-20	5.20572e-19
DGCR8	4.85976	4.42641	-0.134747	7.80178e-05	0.00012622
DHX9	35.4161	28.093	-0.334192	6.53539e-15	2.81354e-14
DLX2	0.0784109	0.0420659	-0.898404	7.76538e-10	2.07622e-09
DPY30	16.7323	18.0964	0.113066	0.0354731	0.043952
DUSP16	10.382	9.79572	-0.0838633	0.0324175	0.0407626
DUSP3	18.7762	17.3485	-0.114089	0.00243158	0.00335663
E2F1	1.0742	4.03025	1.9076	4.20343e-26	5.93151e-25
EPHA3	6.65915	1.4943	-2.15587	1.27014e-28	5.37693e-27
ERRFI1	61.6639	34.4533	-0.839787	0.00913372	0.0120205
EWSR1	20.9351	19.2854	-0.11841	0.00180096	0.00251342
EZH2	0.886957	1.14598	0.369641	4.09176e-10	1.12968e-09
FBXO31	4.64989	5.98789	0.364851	3.48036e-16	1.70002e-15
FOS	654.879	221.009	-1.56712	3.31489e-15	1.45169e-14
FOXM1	0.567575	0.695415	0.293063	1.58865e-05	2.78288e-05
FOXO3	11.4832	8.44378	-0.443567	7.46254e-09	1.85832e-08
GATA4	0.0428469	0.00932566	-2.19991	2.74693e-18	1.51678e-17
GLB1	23.3981	26.9215	0.202368	4.13901e-07	8.47829e-07
GNG11	13.0413	11.3378	-0.201946	0.000317194	0.000476729
HDAC1	42.0998	47.2948	0.167866	0.00354494	0.00481506
HDAC4	2.71355	1.10965	-1.29008	6.08051e-27	1.02963e-25
HEPACAM	0.0172204	0.00569719	-1.5958	8.13668e-17	4.13343e-16
HIVEP1	2.05584	2.62719	0.353792	0.000473546	0.000687318
HK3	0.740547	1.43568	0.955067	1.99181e-06	3.77551e-06
HRAS	10.8365	15.2238	0.49044	8.21229e-12	2.48324e-11
HSPA5	477.795	307.018	-0.63807	8.07486e-13	2.62951e-12
ID1	195.712	125.12	-0.645426	6.84722e-08	1.48649e-07
ID4	287.942	110.564	-1.3809	3.95172e-27	7.16954e-26
IFNG	0.495834	0.25607	-0.953321	0.000100131	0.000158958
IGFBP1	0.0204214	0.0654996	1.6814	0.000155702	0.000241148
IGFBP3	8.27711	26.3352	1.66979	1.55437e-10	4.43607e-10
IGFBP6	25.0737	148.878	2.56988	3.4284e-13	1.20946e-12
IL1A	0.234715	0.136921	-0.777573	9.22709e-05	0.000147401
ING1	2.48208	2.31216	-0.102307	0.0185036	0.0237369
IRF3	15.1977	19.4541	0.356218	2.54325e-07	5.25192e-07
IRF5	1.53027	3.33683	1.1247	1.44525e-16	7.19793e-16
ITGB4	4.4144	16.9559	1.9415	4.40038e-18	2.37808e-17
ITPK1	9.81335	14.3456	0.547793	1.66213e-12	5.2121e-12
ITPKB	5.56668	7.42174	0.414939	4.45053e-08	1.02767e-07
ITSN2	13.0895	10.5189	-0.315421	5.04867e-07	1.01775e-06
KCNJ12	1.12223	0.919093	-0.288084	0.000257305	0.00038902
KDM5B	5.02438	5.76212	0.197654	0.00142873	0.00200496
KL	0.500644	1.61101	1.68611	1.76219e-22	1.49199e-21
KSR2	0.681813	0.493488	-0.466362	6.75128e-08	1.4783e-07
LATS1	4.75764	4.18169	-0.186162	7.80178e-05	0.00012622
LEO1	7.90318	8.96865	0.182458	1.48284e-05	2.61557e-05
LGALS3	26.5564	156.124	2.55556	2.91423e-19	1.72143e-18
LIMK1	5.553	11.4549	1.04462	3.13533e-28	1.0933e-26
MAD2L1	0.66554	0.70971	0.0927038	0.000712619	0.00101688
MAGOH	21.8315	19.0903	-0.193573	0.000370421	0.000553452
MAGOHB	2.31284	2.15771	-0.100162	0.0177195	0.0228465
MAP2K1	10.6178	12.2062	0.201122	0.000226946	0.000347254
MAP2K2	18.7074	22.0668	0.238267	6.47119e-08	1.42929e-07
MAP2K3	12.0004	13.0813	0.124419	1.63796e-05	2.8496e-05
MAP2K6	0.63511	0.381642	-0.734786	5.18472e-14	2.02129e-13
MAP2K7	7.51689	8.94928	0.251636	4.57121e-09	1.17282e-08
MAP3K6	3.95404	9.98383	1.33627	5.05371e-28	1.42627e-26
MAPK12	0.301077	0.497439	0.724389	7.307e-10	1.99567e-09
MAPK14	11.3161	12.3435	0.125366	0.0327608	0.0409914
MAST1	0.0426007	0.100346	1.23603	1.24062e-12	3.98882e-12
MCL1	130.401	94.4796	-0.464878	1.8016e-05	3.05071e-05
MCRS1	22.457	21.2257	-0.0813578	0.00897727	0.011935
MDH1	24.1825	26.7423	0.145158	0.000627832	0.000906076
MECP2	5.09873	4.55192	-0.163663	1.11435e-05	2.0074e-05
MYC	11.9383	6.84975	-0.801477	1.66315e-05	2.87375e-05
NDRG1	21.4407	13.4956	-0.667855	3.07127e-24	3.71477e-23
NEK1	3.734	2.34564	-0.670741	5.8645e-21	4.25595e-20
NEK4	4.7928	3.57359	-0.423497	3.53637e-14	1.42578e-13
NEK6	4.85115	4.15134	-0.224748	0.00100752	0.00142966
NFE2L2	38.6507	28.7233	-0.428274	1.67483e-19	1.01288e-18
NINJ1	33.2545	59.2899	0.834238	5.24641e-24	6.05722e-23
NOTCH3	6.26911	13.5366	1.11053	1.42199e-20	1.0033e-19
NOX4	0.216537	1.1766	2.44194	7.61796e-28	1.93496e-26
P3H1	2.68451	4.09098	0.607785	3.84568e-20	2.50462e-19
PBRM1	8.02637	6.57995	-0.286672	5.13298e-08	1.15378e-07
PCGF2	12.2544	19.914	0.700482	9.03561e-23	8.19659e-22
PDCD10	9.01709	8.49806	-0.0855277	0.011049	0.014392
PDPK1	4.03219	3.3364	-0.273273	3.16035e-11	9.22676e-11
PDZD2	0.331622	0.474231	0.516049	0.00228609	0.00317304
PEBP1	790.185	589.985	-0.421512	3.74196e-13	1.2844e-12
PEX19	22.0424	24.976	0.180266	0.000136946	0.0002134
PIAS4	4.90612	5.36509	0.12902	0.000254776	0.000387504
PIK3C2A	11.7906	8.1822	-0.527075	6.987e-15	2.95783e-14
PIM1	11.9182	8.40952	-0.503066	0.000220265	0.000339075
PKM	65.6973	97.3773	0.567751	1.88763e-14	7.85997e-14
PLA2R1	21.7553	2.94284	-2.88608	3.99552e-32	8.45646e-30
PML	5.7467	8.68143	0.595198	1.00765e-23	1.11279e-22
PNPT1	5.40743	4.66406	-0.213358	2.15171e-07	4.51681e-07
POT1	5.04874	4.03421	-0.323639	6.75419e-14	2.56054e-13
PPM1B	7.25987	5.94977	-0.287108	3.62687e-13	1.26195e-12
PPM1D	3.78496	3.31134	-0.192863	2.36445e-05	3.97729e-05
PRKCD	35.126	44.3705	0.337061	4.29245e-13	1.45371e-12
PRKCH	4.59688	5.31239	0.208706	0.00752055	0.0100538
PRMT6	8.29767	6.13939	-0.434611	1.30274e-12	4.1362e-12
PROX1	4.23808	0.980982	-2.11111	7.19689e-29	3.65602e-27
PRPF19	40.3919	45.2918	0.165185	4.66515e-09	1.18495e-08
PSMB5	44.0974	45.9649	0.0598377	0.0272709	0.0344617
PSMD14	5.98111	6.33075	0.0819631	0.0137602	0.017832
PTTG1	27.9175	19.6289	-0.508188	2.60609e-05	4.35492e-05
RAD21	33.4021	27.3979	-0.285873	2.94646e-08	6.92963e-08
RAF1	16.617	14.7723	-0.169764	1.52631e-08	3.65738e-08
RBP2	0.136682	0.0903313	-0.597521	5.22388e-08	1.16392e-07
RPS6KA6	4.48383	1.51689	-1.56362	3.44348e-28	1.0933e-26
RUNX1	0.700827	3.59688	2.35962	5.79013e-23	5.44701e-22
RUVBL2	19.6974	22.7983	0.21092	1.70813e-05	2.93153e-05
SELENOH	28.1862	34.3023	0.283316	4.24326e-08	9.88796e-08
SENP2	7.34182	6.26	-0.229974	1.15754e-08	2.82707e-08
SENP7	5.12695	4.00322	-0.356942	5.80126e-09	1.45893e-08
SERPINE1	11.8586	16.1116	0.442163	0.000452999	0.000672875
SFN	1.60497	23.3826	3.86482	3.97394e-16	1.86922e-15
SGK1	12.9133	7.77952	-0.731106	2.76041e-14	1.13088e-13
SIRT1	8.19919	6.19053	-0.405418	6.71922e-12	2.05624e-11
SIRT6	5.52725	7.56362	0.452515	3.26097e-13	1.1666e-12
SLC16A7	0.459023	0.241606	-0.925909	1.8648e-21	1.48018e-20
SMARCA4	10.8085	16.1376	0.578268	8.46453e-26	1.07499e-24
SMARCB1	30.7463	35.2499	0.197205	1.59535e-08	3.7871e-08
SMG1	5.67059	3.65484	-0.633692	1.20194e-15	5.35599e-15
SMURF2	5.7854	7.21075	0.317731	2.39843e-07	4.99344e-07
SNAI1	9.87278	4.1076	-1.26516	4.53495e-23	4.43029e-22
SORBS2	32.0108	9.10759	-1.81342	5.86194e-26	7.83649e-25
SOX2	0.0284471	0.0245266	-0.213935	0.000462382	0.000680024
SOX5	0.630245	0.191154	-1.72118	2.56421e-27	5.01007e-26
SPIN1	26.9017	24.5535	-0.131767	0.00046611	0.000680413
SPOP	12.1847	10.8871	-0.162452	1.35943e-08	3.28852e-08
SRC	5.14062	7.99019	0.636288	1.73334e-21	1.42022e-20
SREBF1	7.60212	18.4147	1.27639	2.80137e-26	4.44718e-25
SRSF1	48.5928	37.2952	-0.381754	5.77119e-21	4.25595e-20
STK32C	1.95494	1.8093	-0.111693	0.00902172	0.011935
STK40	14.5299	11.462	-0.342165	1.85707e-09	4.81322e-09
SUPT5H	19.8852	22.3676	0.169718	2.28524e-10	6.44945e-10
SYK	26.7706	17.7951	-0.589169	5.77927e-20	3.66984e-19
TBX2	2.0222	3.79025	0.906372	0.000114936	0.000181328
TERC	0.143563	0.0295715	-2.2794	3.93781e-17	2.04123e-16
TERF2	7.23208	6.45756	-0.163422	3.26852e-05	5.42616e-05
TFAP4	1.38705	1.69248	0.287111	0.00285667	0.00392213
TFDP1	19.8691	15.2661	-0.380199	2.39789e-20	1.6028e-19
TGFB1I1	3.60735	7.18083	0.993211	4.09143e-26	5.93151e-25
TLR3	2.55268	1.46745	-0.7987	1.59501e-18	9.00294e-18
TMSB4X	331.205	639.258	0.948674	6.87833e-13	2.29881e-12
TNFSF13	8.15842	10.2186	0.324841	9.57139e-06	1.73652e-05
TNFSF15	0.545567	1.90517	1.80409	1.52729e-20	1.04846e-19
TP53	10.5245	13.5042	0.359647	4.99489e-12	1.5472e-11
TP63	0.13425	0.710648	2.40421	1.23668e-06	2.39784e-06
TPR	12.454	11.0679	-0.170232	8.19627e-05	0.000131763
TRIM28	58.9297	66.1439	0.166615	7.77135e-06	1.42009e-05
TRPM8	0.0102513	0.024616	1.26379	4.43113e-07	9.00406e-07
TXN	66.5406	79.3038	0.253156	1.44909e-05	2.57391e-05
TXNIP	290.574	215.464	-0.431462	3.30491e-05	5.45095e-05
UBTD1	9.04276	18.8712	1.06135	1.02585e-27	2.36879e-26
USP1	10.9543	8.86047	-0.306043	7.91473e-10	2.09411e-09
VEGFA	35.1731	26.7032	-0.397459	2.7764e-06	5.22375e-06
VENTX	0.248149	0.338342	0.447274	0.00121548	0.00171517
WRN	2.32797	1.74589	-0.415111	2.04083e-11	6.02758e-11
WWP1	9.37461	6.37223	-0.556961	1.37245e-22	1.20208e-21
YAP1	25.4399	29.029	0.190398	0.0047053	0.00632353
YPEL3	14.6068	19.4972	0.416626	1.01602e-06	2.00054e-06
ZFP36	287.505	149.179	-0.946539	5.10868e-08	1.15378e-07
ZMAT3	3.07058	10.3801	1.75724	2.52564e-31	2.13837e-29
ZNF148	10.5648	7.27093	-0.539056	2.07377e-13	7.52483e-13
