# Supplementary material for: Comprehensive analysis of cellular senescence and immune microenvironment in papillary thyroid carcinoma
Source: Aging (Albany NY). 2024 Feb 7;16(3):2866–86. doi: 10.18632/aging.205520 (PMC10911381; doi:10.18632/aging.205520)
Supplement: Supplementary Table 3 [file aging-16-205520-s004.xlsx]

## Sheet: Supplementary Table 3
Supplementary Table 3. 76 intersecting genes.
RPS6KA6
SYK
ASPH
LGALS3
FOS
DEK
PROX1
HSPA5
SREBF1
SMARCA4
PCGF2
NINJ1
SFN
SNAI1
CKB
ITPK1
KL
UBTD1
TP53
IRF5
ID1
EPHA3
SRSF1
TNFSF15
BCL6
MAP3K6
VEGFA
CDKN2A
LIMK1
TMSB4X
PML
CAV1
CDKN1A
IRF3
NOTCH3
E2F1
SGK1
ALOX15B
PKM
HDAC4
CSNK2A1
PEBP1
TERF2
TXNIP
PLA2R1
PRKCD
WWP1
ID4
BHLHE40
NEK1
PTTG1
TLR3
ZMAT3
RAD21
TNFSF13
DDB2
SPOP
ITGB4
P3H1
NEK4
CDK2AP1
NDRG1
TFDP1
SRC
ZNF148
GNG11
NOX4
BAG3
CCND1
SORBS2
NFE2L2
PIK3C2A
DHX9
POT1
CDKN1C
IGFBP6
